# Supplementary material
Source: publisher figshare collection journal article supplement (https://gsajournals.figshare.com/ndownloader/files/28102722)
Supplement: Supplementary file 1 [file 28102722]

**Figure S3.** Distribution of within-location BLUP values for 15 fresh kernel elemental phenotypes in the sweet corn association panel evaluated in NY and WI. Mean values of fresh kernel elemental concentration with significant differences (*P* < 0.05) between the two locations were designated with an asterisk (‘*’) according to a paired *t*-test.
